# Supplementary material
Source: publisher figshare collection journal article supplement (https://acs.figshare.com/ndownloader/files/10648828)
Supplement: Supplementary file 1 [file 10648828]

**Supporting Information**

**For**

**Direct Observation of Simultaneous Immobilization of  
Cadmium and Arsenate at the Brushite-Fluid Interface**

**Hang Zhai,<sup>†</sup> Lijun Wang,<sup>\*,†</sup> Lihong Qin,<sup>†</sup> Wenjun Zhang,<sup>\*,†</sup> Christine V. Putnis,<sup>‡,§</sup>  
and Andrew Putnis<sup>‡,¶</sup>**

<sup>†</sup>College of Resources and Environment, Huazhong Agricultural University, Wuhan  
430070, China

<sup>‡</sup>Institut für Mineralogie, University of Münster, 48149 Münster, Germany

<sup>§</sup>Department of Chemistry, <sup>¶</sup>The Institute for Geoscience Research (TIGeR),  
Curtin University, Perth, Western Australia 6845, Australia

**SI TABLES (S1-S6)**

**SI FIGURES (S1-S9)**

**Table S1.** Aqueous conditions used in CdCl<sub>2</sub> solutions.

| pH      | [CdCl <sub>2</sub> ]<br>(μM) | [Na <sub>2</sub> HAsO <sub>4</sub> ]<br>(μM) | [NaCl]<br>(mM) |
|---------|------------------------------|----------------------------------------------|----------------|
| 5.5-6.0 | 0                            | 0                                            | 0              |
| 4.0     | 5                            | 0                                            | 0              |
| 6.0     | 5                            | 0                                            | 0              |
|         | 50                           | 0                                            | 0              |
|         | 500                          | 0                                            | 0              |
| 8.0     | 5                            | 0                                            | 0              |

**Table S2.** Aqueous conditions used in Na<sub>2</sub>HAsO<sub>4</sub> solutions.

| pH   | [CdCl <sub>2</sub> ]<br>(μM) | [Na <sub>2</sub> HAsO <sub>4</sub> ]<br>(μM) | [NaCl]<br>(mM) |
|------|------------------------------|----------------------------------------------|----------------|
| 4.0  | 0                            | 50                                           | 0              |
| 6.0  | 0                            | 50                                           | 0              |
| 8.0  | 0                            | 5                                            | 0              |
|      | 0                            | 50                                           | 0              |
|      | 0                            | 500                                          | 0              |
| 10.0 | 0                            | 50                                           | 0              |

**Table S3.** Aqueous conditions used in the presence of NaCl.

|     | [CdCl <sub>2</sub> ]<br>(μM) | [Na <sub>2</sub> HAsO <sub>4</sub> ]<br>(μM) | [NaCl]<br>(mM) |
|-----|------------------------------|----------------------------------------------|----------------|
| Cd  | 5                            | 0                                            | 0.01           |
| pH  | 5                            | 0                                            | 0.1            |
| 6.0 | 5                            | 0                                            | 1              |
|     | 5                            | 0                                            | 10             |
|     | 5                            | 0                                            | 100            |
| As  | 0                            | 50                                           | 0.01           |
| pH  | 0                            | 50                                           | 0.1            |
| 8.0 | 0                            | 50                                           | 1              |
|     | 0                            | 50                                           | 10             |
|     | 0                            | 50                                           | 100            |

**Table S4.** Aqueous conditions used in the presence of both Cd and As.

| pH  | [CdCl <sub>2</sub> ]<br>(μM) | [Na <sub>2</sub> HAsO <sub>4</sub> ]<br>(μM) | [NaCl]<br>(mM) |
|-----|------------------------------|----------------------------------------------|----------------|
| 6.0 | 5                            | 50                                           | 0              |
| 8.0 | 5                            | 50                                           | 0              |

**Table S5.** Aqueous conditions used in TEM experiments.

| pH  | [CdCl <sub>2</sub> ]<br>(μM) | [Na <sub>2</sub> HAsO <sub>4</sub> ]<br>(μM) | [NaCl]<br>(mM) |
|-----|------------------------------|----------------------------------------------|----------------|
| 6.0 | 500                          | 0                                            | 0              |
| 8.0 | 0                            | 500                                          | 0              |
| 8.0 | 5                            | 50                                           | 0              |

**Table S6.** The speciation calculation in 500 μM CdCl<sub>2</sub> solutions using the ECOSAT software.

| pH  | [Cd(OH) <sub>2</sub> ] (M) | [CdO] (M) | CdCO <sub>3</sub> (M)   |
|-----|----------------------------|-----------|-------------------------|
| 4.0 | 0                          | 0         | 0                       |
| 4.5 | 0                          | 0         | 0                       |
| 5.0 | 0                          | 0         | 0                       |
| 5.5 | 0                          | 0         | 0                       |
| 6.0 | 0                          | 0         | 0                       |
| 6.0 | 0                          | 0         | 0                       |
| 6.5 | 0                          | 0         | $1.3135 \times 10^{-5}$ |
| 7.0 | 0                          | 0         | $4.5104 \times 10^{-4}$ |
| 7.5 | 0                          | 0         | $4.9504 \times 10^{-4}$ |
| 8.0 | 0                          | 0         | $4.9948 \times 10^{-4}$ |

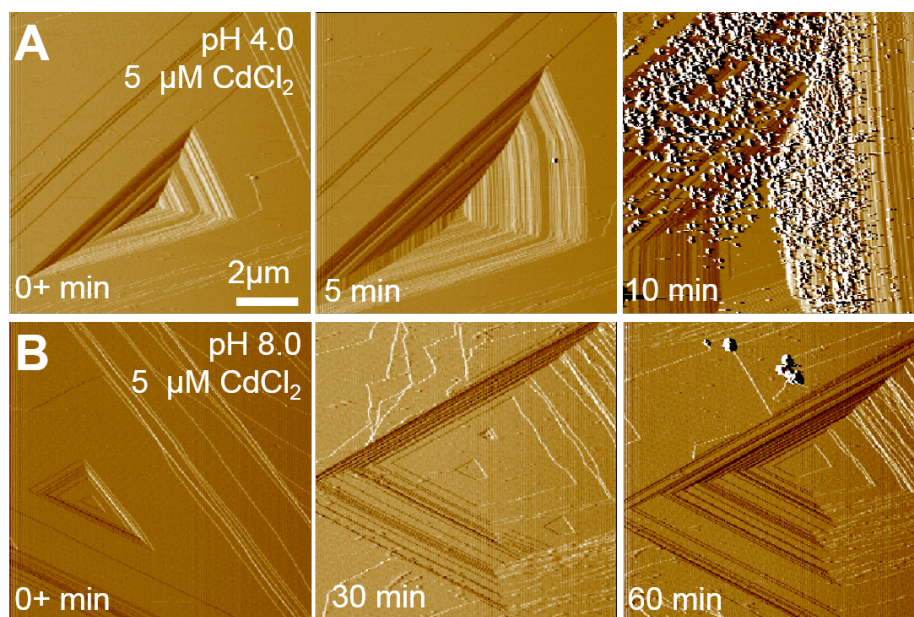

**Figure S1.** Time sequence of AFM deflection images of brushite dissolved in the presence of 5  $\mu\text{M}$   $\text{CdCl}_2$  at (A) pH 4.0, (B) 8.0.



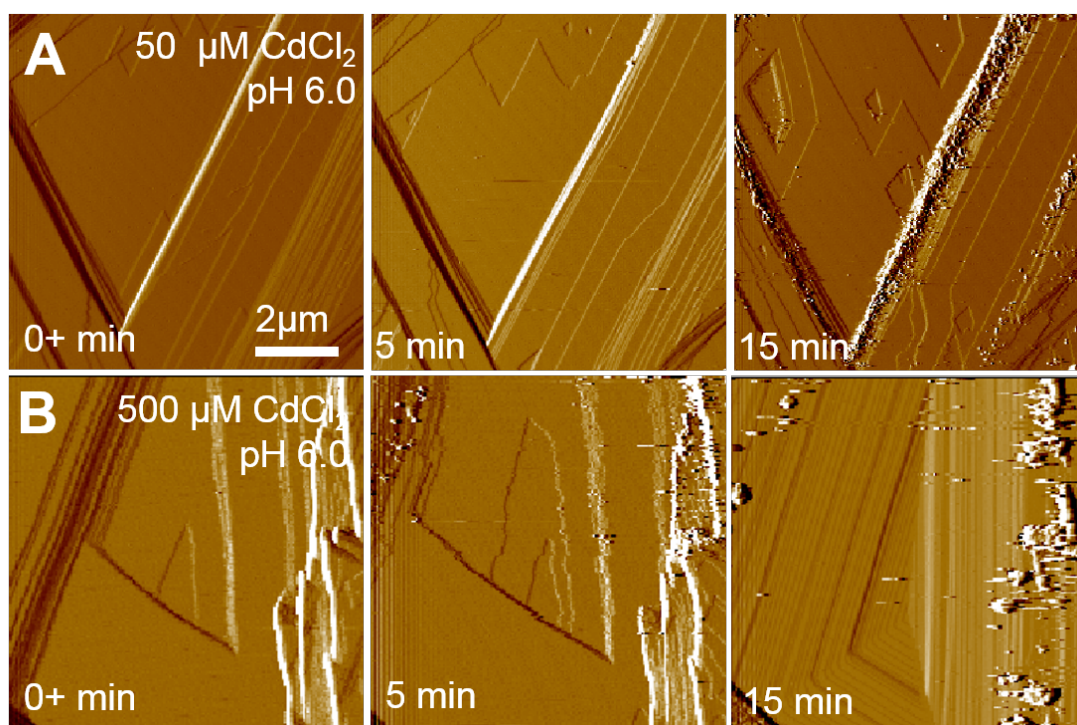

**Figure S2.** Time sequence of AFM deflection images of brushite dissolved in the presence of (A) 50  $\mu\text{M}$  and (B) 500  $\mu\text{M}$   $\text{CdCl}_2$  at pH 6.0.

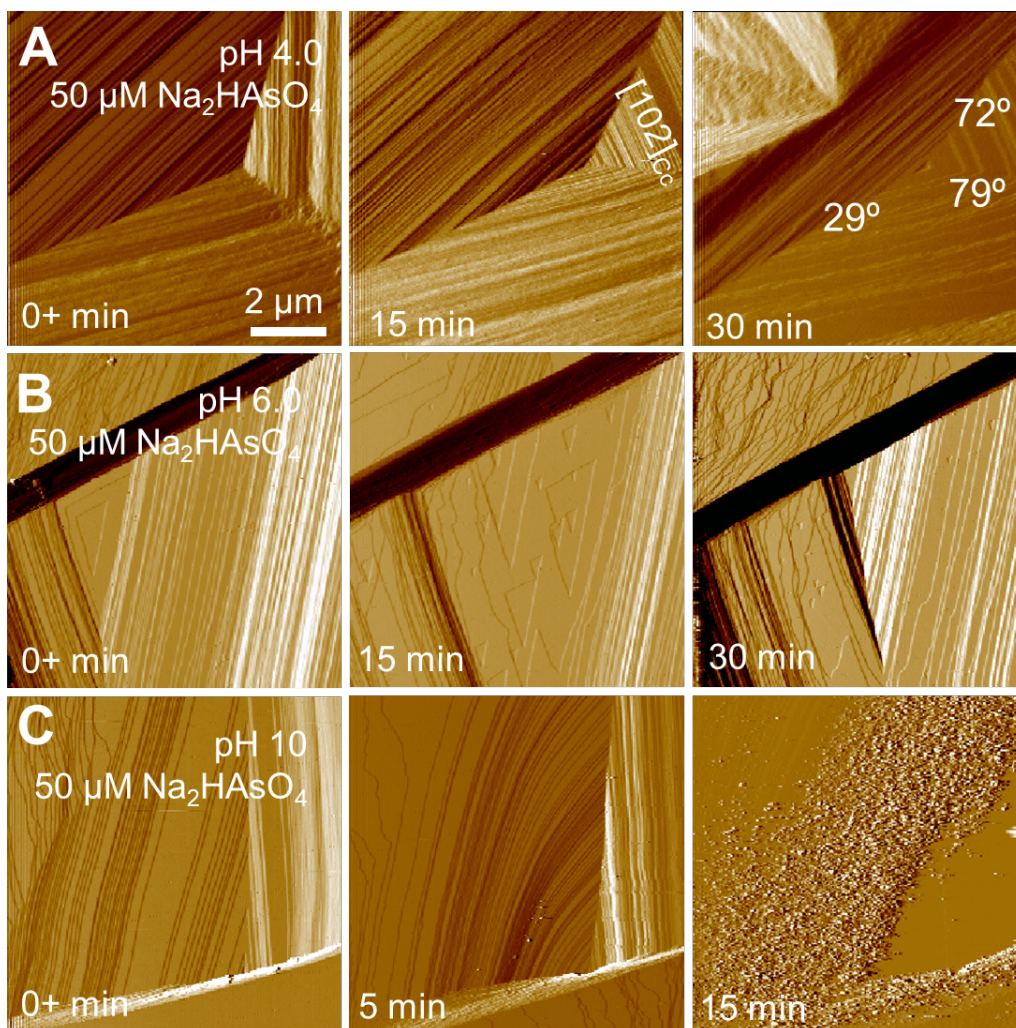

**Figure S3.** Time sequence of AFM deflection images of brushite dissolved in the presence of 50  $\mu\text{M}$   $\text{Na}_2\text{HAsO}_4$  at (A) pH 4.0, (B) 6.0 and (C) 10.0.

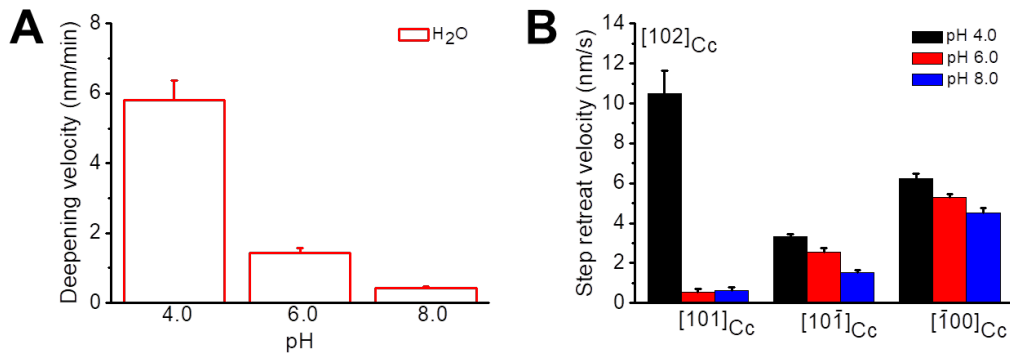

**Figure S4.** (A) Deepening velocities of etch pits formed at the brushite (010) surface in pure water at pH 4.0, 6.0, or 8.0. (B) Step retreat velocities of the  $[102]_{Cc}$ ,  $[101]_{Cc}$ ,  $[10\bar{1}]_{Cc}$ ,  $[\bar{1}00]_{Cc}$  in water at 4.0, 6.0, or 8.0, respectively. All the velocities are presented as mean value  $\pm$  SD.

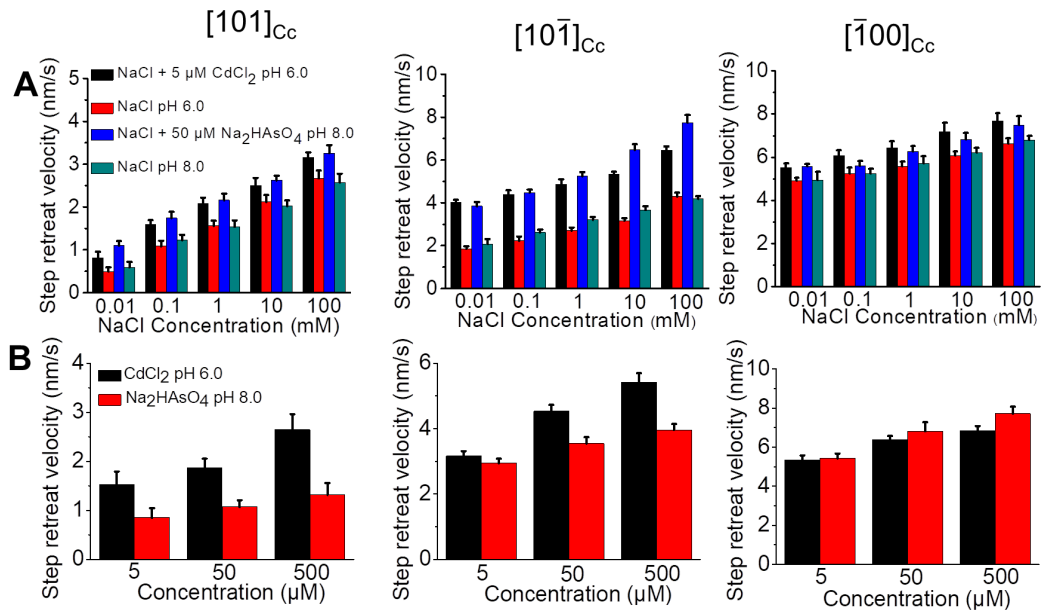

**Figure S5.** Step retreat velocities of etch pits along the  $[101]_{Cc}$ ,  $[10\bar{1}]_{Cc}$  and  $[\bar{1}00]_{Cc}$  directions in presence of (A) NaCl + 5  $\mu\text{M}$  CdCl<sub>2</sub> or NaCl + 50  $\mu\text{M}$  Na<sub>2</sub>HAsO<sub>4</sub>, (B) different concentration CdCl<sub>2</sub> at pH 6.0 or different concentration Na<sub>2</sub>HAsO<sub>4</sub> at pH 8.0, showing that the velocities were changed by the additives. The step retreat velocities are presented as mean value  $\pm$  SD.



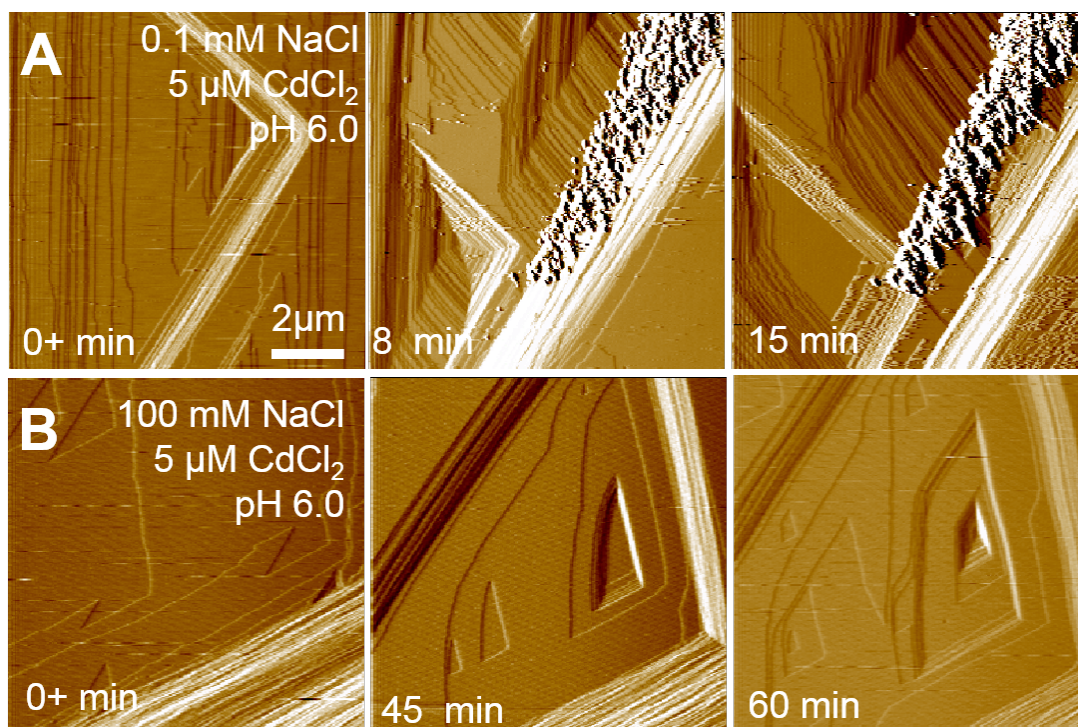

**Figure S6.** Time sequence of AFM deflection images of brushite dissolved in the presence of 5 μM CdCl<sub>2</sub> + (A) 0.1 mM NaCl and (B) + 100 mM NaCl at pH 6.0.

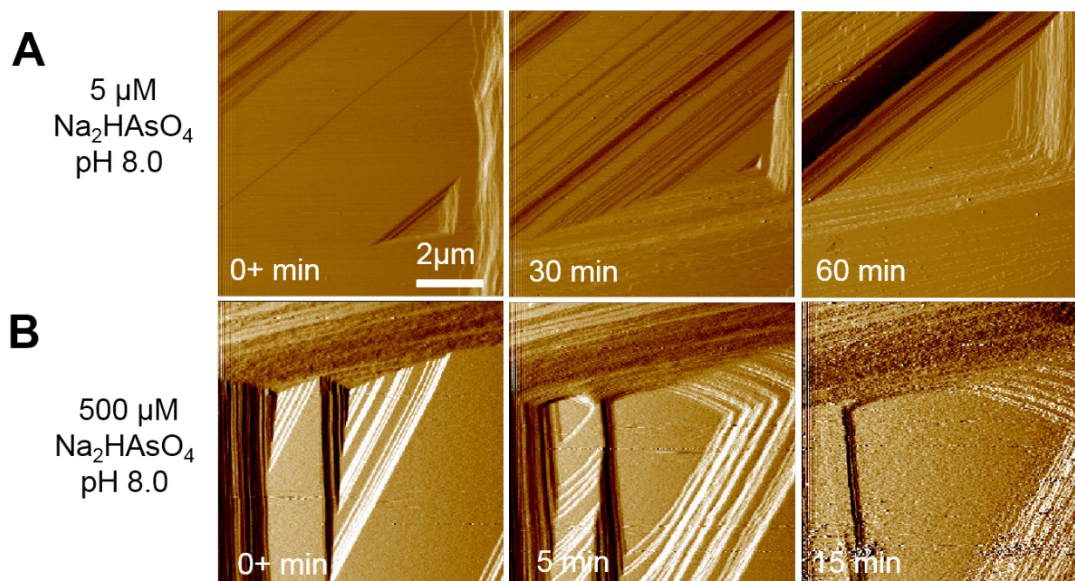

**Figure S7.** Time sequence of AFM deflection images of brushite dissolved in the presence of (A) 5  $\mu\text{M}$  and (B) 500  $\mu\text{M}$   $\text{Na}_2\text{HAsO}_4$  at pH 8.0.

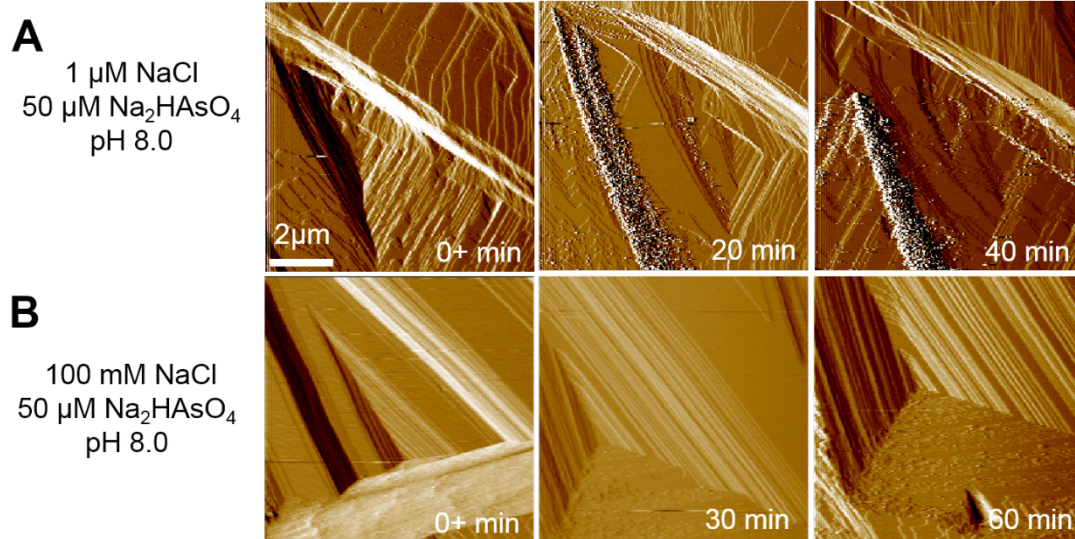

**Figure S8.** Time sequence of AFM deflection images of brushite dissolved in the presence of 5  $\mu\text{M}$  Na<sub>2</sub>HAsO<sub>4</sub> + (A) 0.1 mM NaCl and (B) + 100 mM NaCl at pH 8.0.

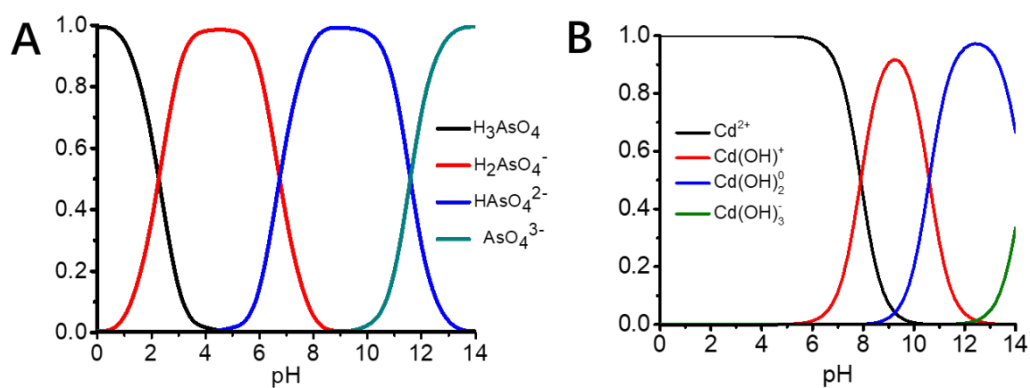

**Figure S9.** The relative speciation distributions in (A) As and (B) Cd solutions.
